# Supplementary material for: The application of amino acid ionic liquids as additives in the ultrasound-assisted extraction of plant material
Source: Royal Society of Chemistry journal article supplement (doi:10.1039/d1ra03840k), 2021-01-01
Supplement: d1ra03840k1.pdf [file d1ra03840k1.pdf]

## ELECTRONIC SUPPLEMENTARY INFORMATION

### The application of amino acid ionic liquids as additives in the ultrasound-assisted extraction of plant material

Barbara Roman<sup>a</sup>, Anna Muzykiewicz-Szymańska<sup>b</sup>, Paula Ossowicz-Rupniewska<sup>a</sup>, Adam Klimowicz<sup>b</sup>, Ewa Janus<sup>a\*</sup>

<sup>a</sup> West Pomeranian University of Technology, Szczecin, Faculty of Chemical Technology and Engineering, Department of Chemical Organic Technology and Polymeric Materials, Piastów Ave. 42, 71-065 Szczecin, Poland

<sup>b</sup> Pomeranian Medical University in Szczecin, Department of Cosmetic and Pharmaceutical Chemistry, Powstańców Wielkopolskich Ave. 72, 70-111 Szczecin, Poland

\*Corresponding author: [ejanus@zut.edu.pl](mailto:ejanus@zut.edu.pl)

#### ESI contents

- |                                                                                             |           |
|---------------------------------------------------------------------------------------------|-----------|
| 1. Copies of <sup>1</sup> H NMR and <sup>13</sup> C NMR spectra of Amino Acid Ionic Liquids | S2 – S5   |
| 2. Copies of FTIR spectra of Amino Acid Ionic Liquids                                       | S6 – S7   |
| 3. Copies of curves from thermogravimetric analysis of Amino Acid Ionic Liquids             | S8 – S9   |
| 4. Copies of curves from DSC analysis of Amino Acid Ionic Liquids                           | S10 – S11 |

# 1. COPIES OF $^1\text{H}$ NMR AND $^{13}\text{C}$ NMR SPECTRA OF AMINO ACID IONIC LIQUID

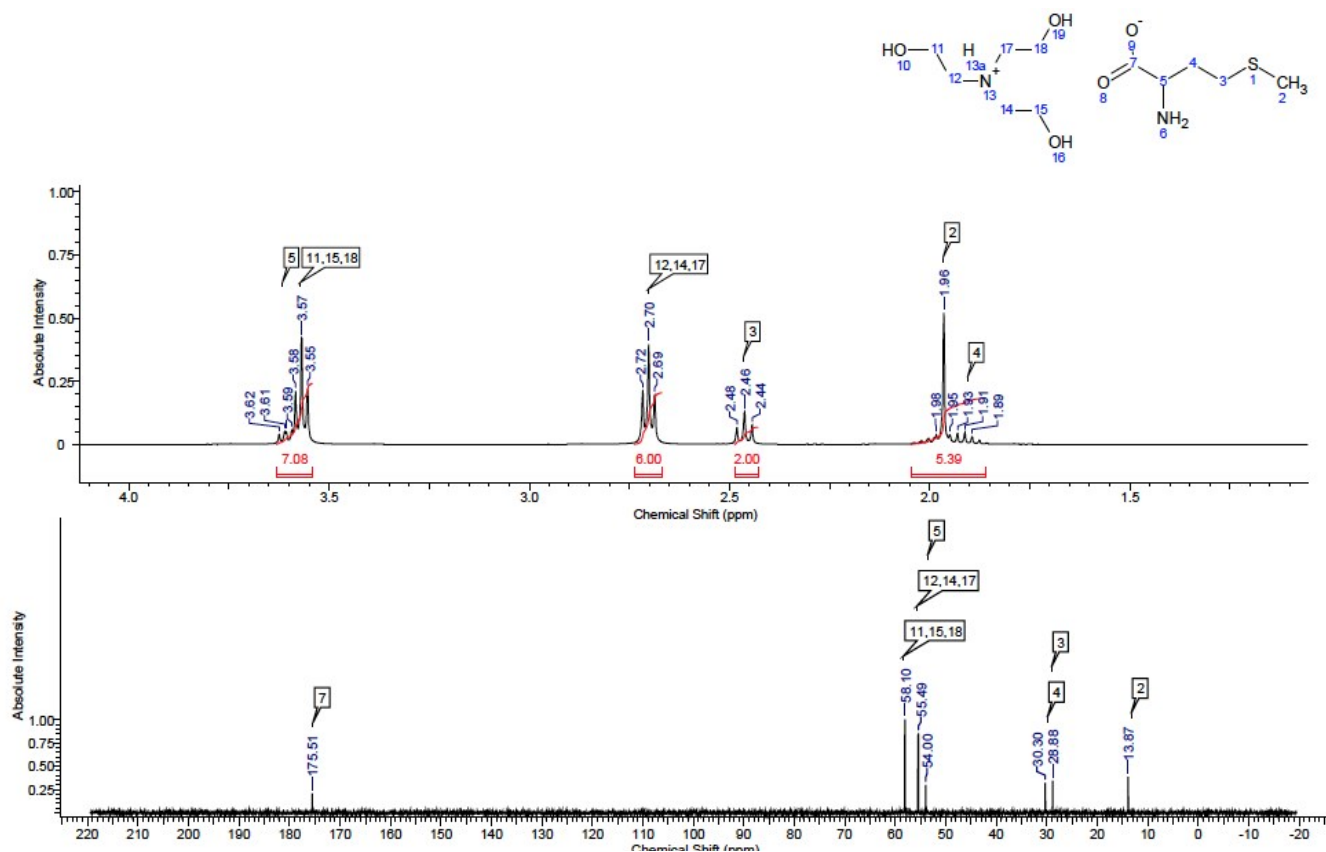

$^1\text{H}$  NMR (upper) and  $^{13}\text{C}$  NMR (bottom) spectra of tris(2-hydroxyethyl)ammonium L-methionate, [TEAH]<sup>+</sup>[Met]<sup>-</sup> in D<sub>2</sub>O

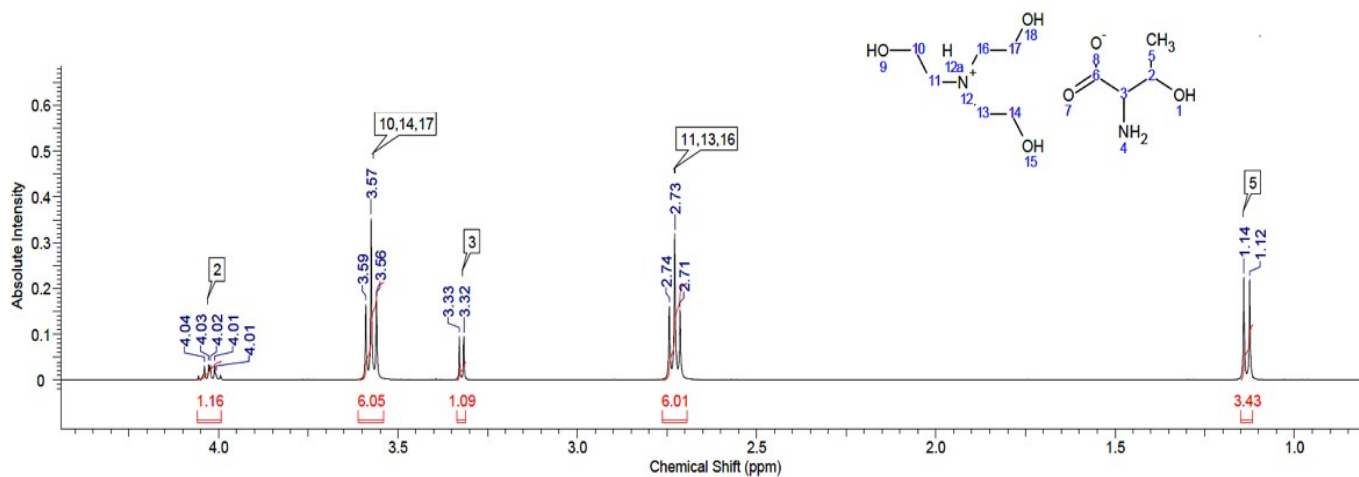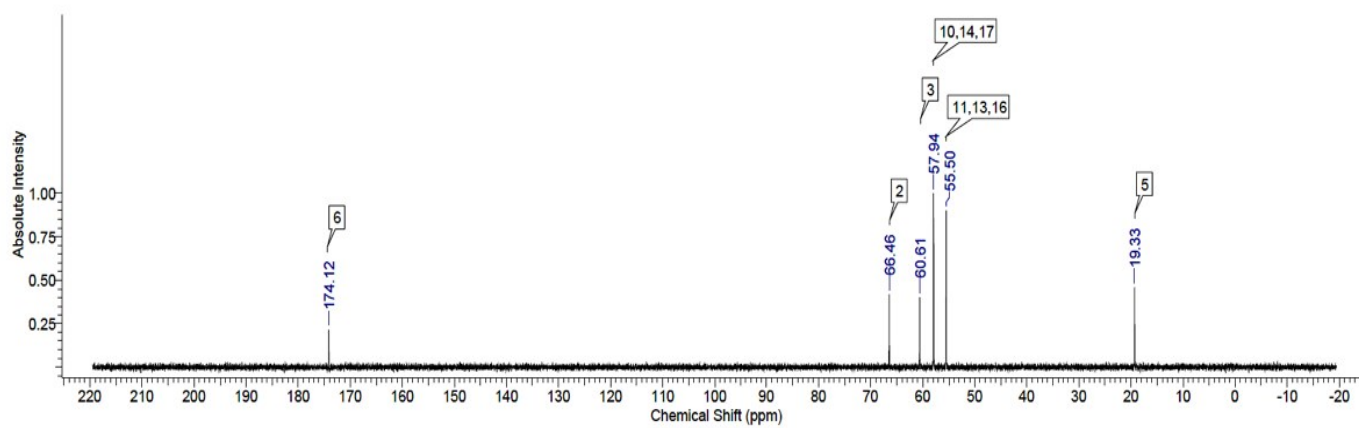

$^1\text{H}$  NMR (upper) and  $^{13}\text{C}$  NMR (bottom) spectra of tris(2-hydroxyethyl)ammonium L-threoninate,  $[\text{TEAH}]^+[\text{Thr}]^-$  in  $\text{D}_2\text{O}$

$^1\text{H}$  NMR (upper) and  $^{13}\text{C}$  NMR (bottom) spectra of tris(2-hydroxyethyl)ammonium L-argininate,  $[\text{TEAH}]^+[\text{Arg}]^-$  in  $\text{D}_2\text{O}$

$^1\text{H}$  NMR (upper) and  $^{13}\text{C}$  NMR (bottom) spectra of tris(2-hydroxyethyl)ammonium L-isoleucinate,  $[\text{TEAH}]^+[\text{Ile}]^-$  in  $\text{D}_2\text{O}$

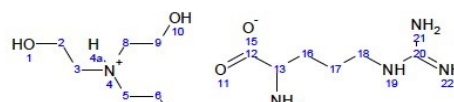

## 2. COPIES OF FT-IR SPECTRA OF AMINO ACID IONIC LIQUIDS

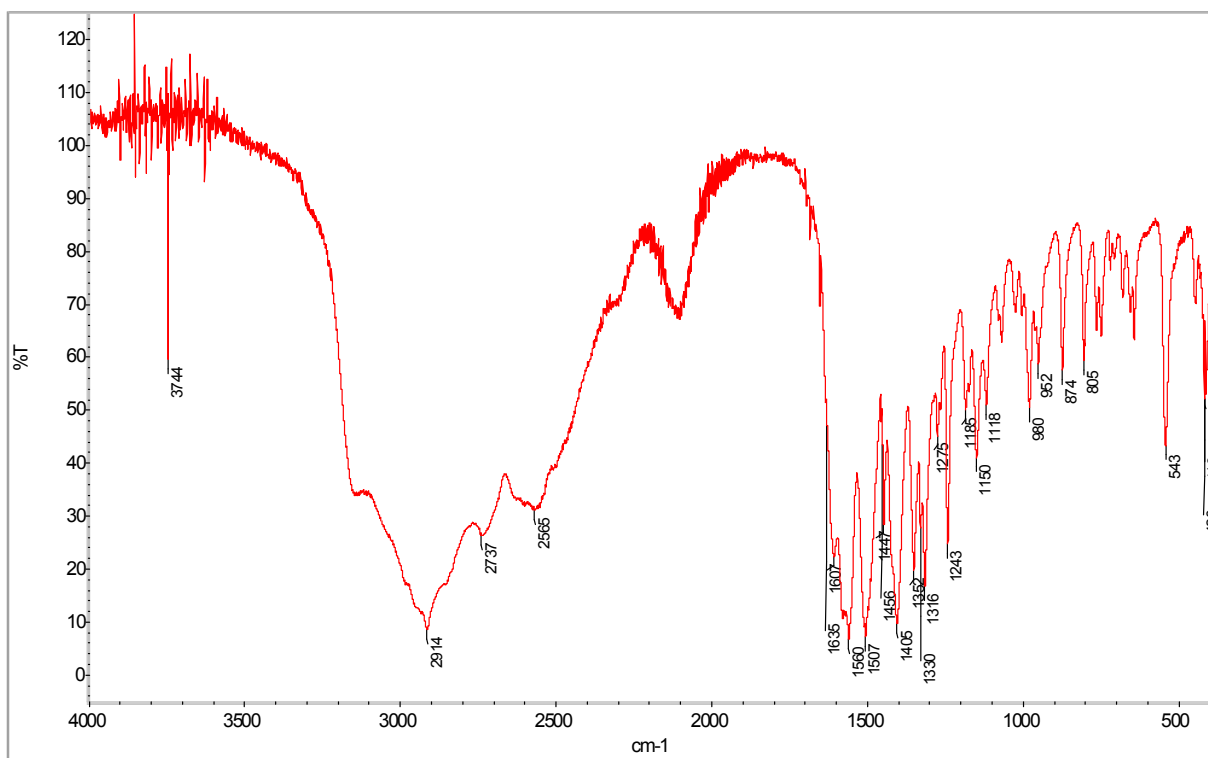

The FT-IR spectra of tris(2-hydroxyethyl)ammonium L-methioninate, [TEAH]<sup>+</sup>[Met]<sup>-</sup>

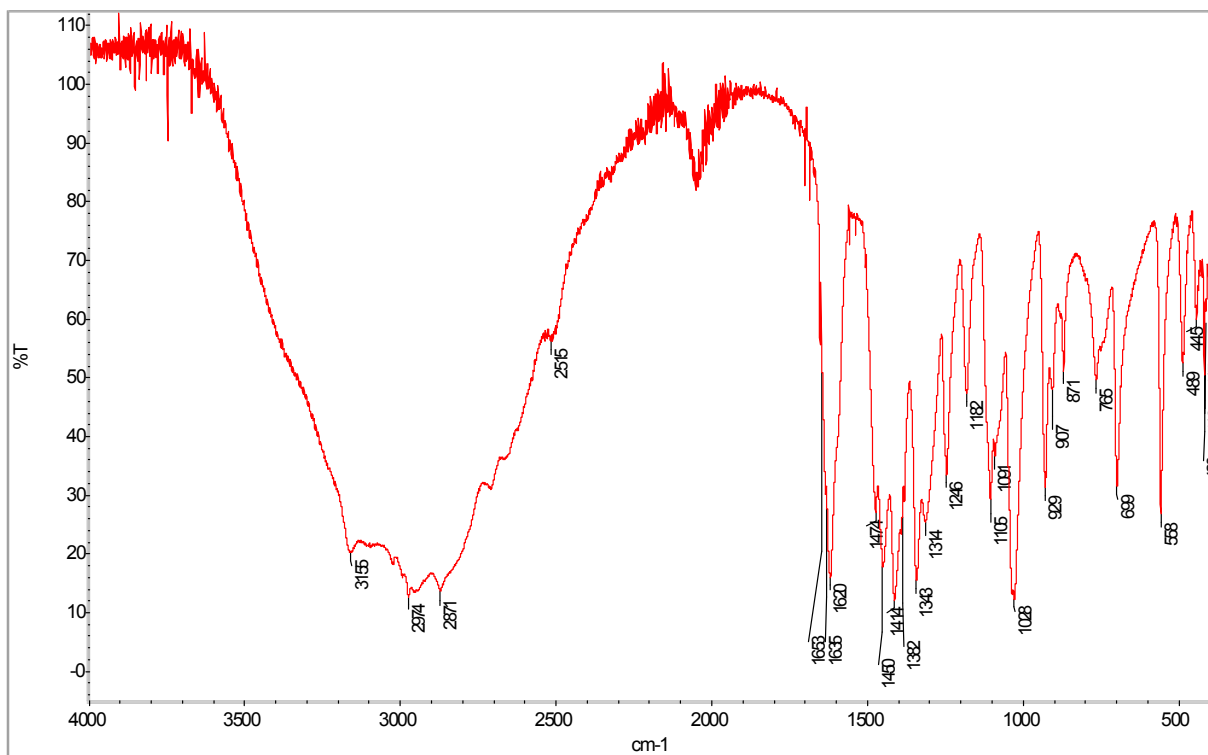

The FT-IR spectra of tris(2-hydroxyethyl)ammonium L-threoninate, [TEAH]<sup>+</sup>[Thr]<sup>-</sup>

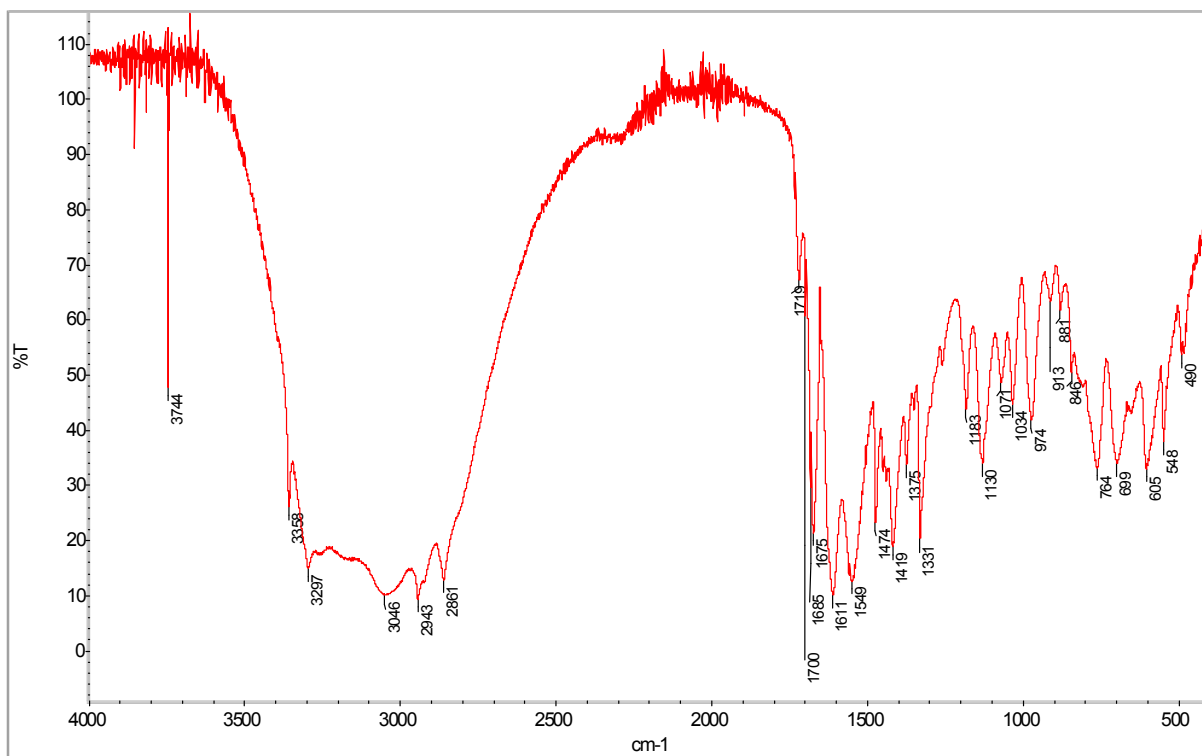

The FT-IR spectra of tris(2-hydroxyethyl)ammonium L-argininate, [TEAH]<sup>+</sup>[Arg]<sup>-</sup>

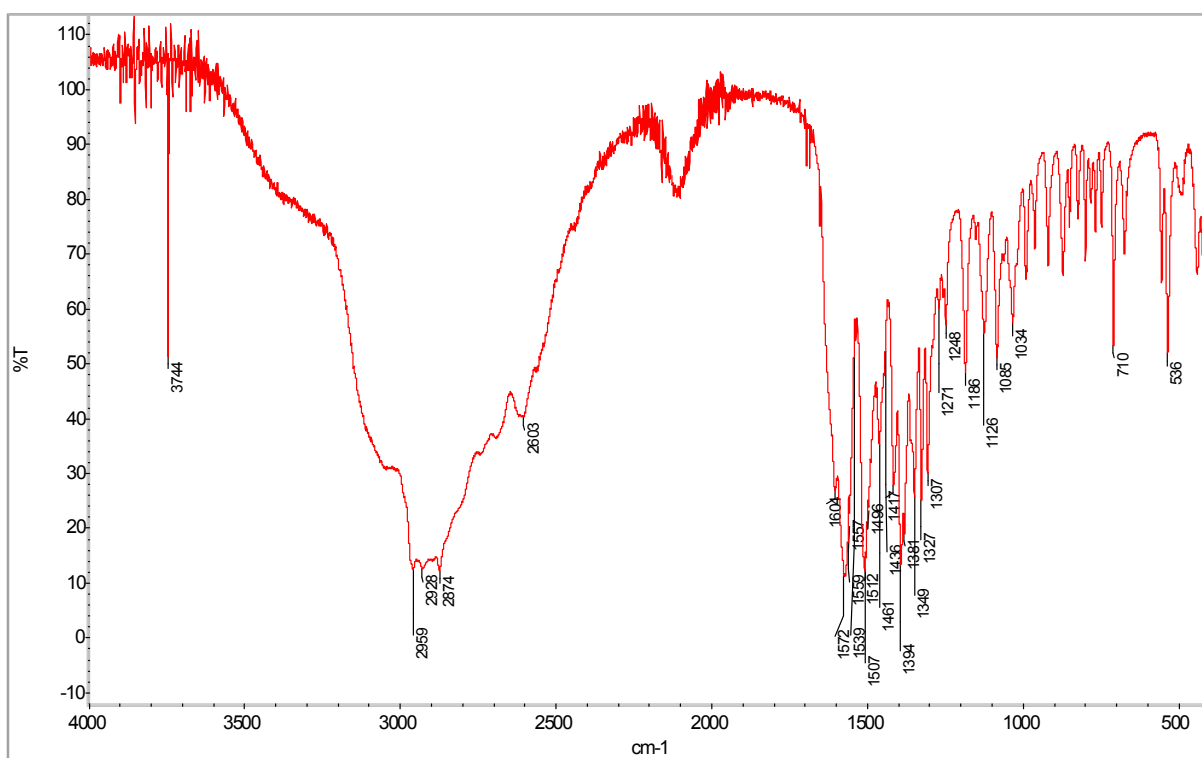

The FT-IR spectra of tris(2-hydroxyethyl)ammonium L-isoleucinate, [TEAH]<sup>+</sup>[Ile]<sup>-</sup>

### 3. COPIES OF CURVES FROM THERMOGRAVIMETRIC ANALYSIS OF AMINO ACID IONIC LIQUIDS

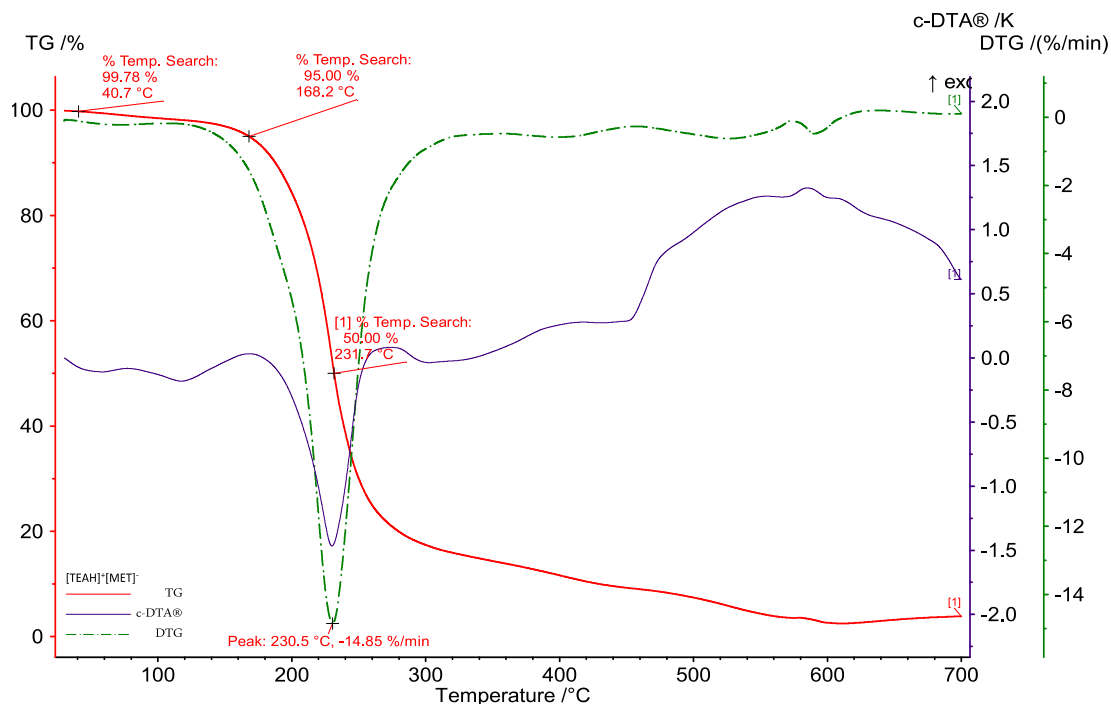

The TG, DTG and c-DTA curves of tris(2-hydroxyethyl)ammonium L-methioninate, [TEAH]<sup>+</sup>[MET]<sup>-</sup>

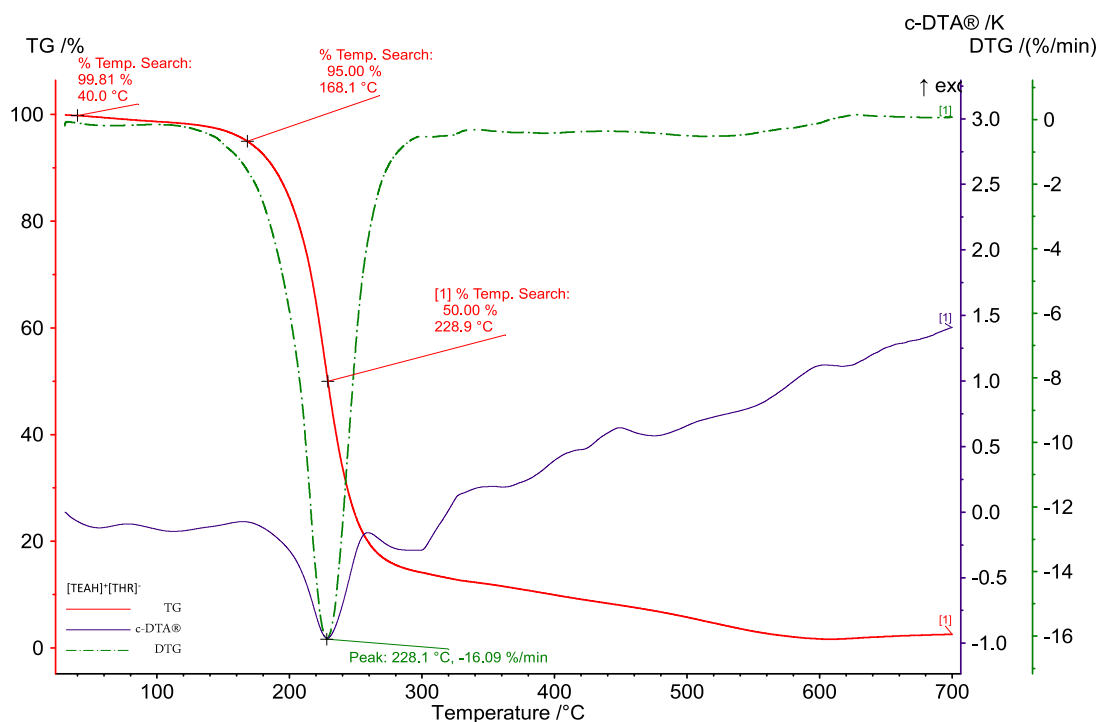

The TG, DTG and c-DTA curves of tris(2-hydroxyethyl)ammonium L-threoninate, [TEAH]<sup>+</sup>[Thr]<sup>-</sup>

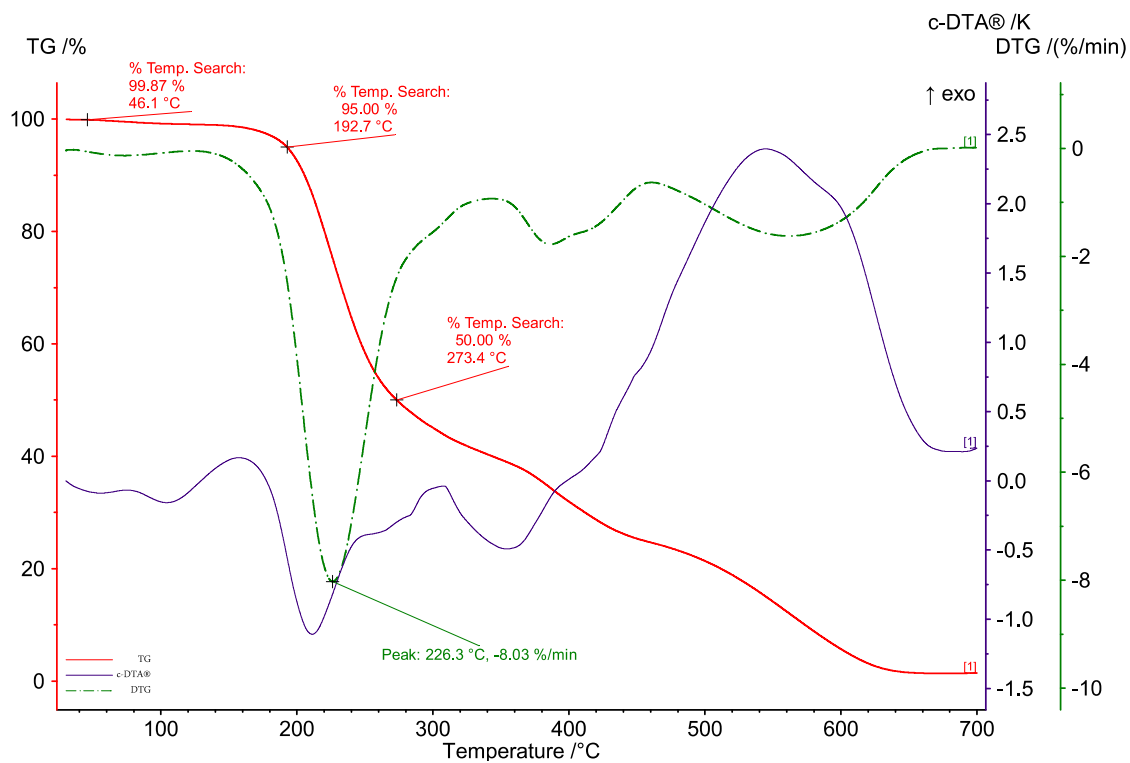

The TG, DTG and c-DTA curves of tris(2-hydroxyethyl)ammonium L- arginate, [TEAH]<sup>+</sup>[Arg]<sup>-</sup>

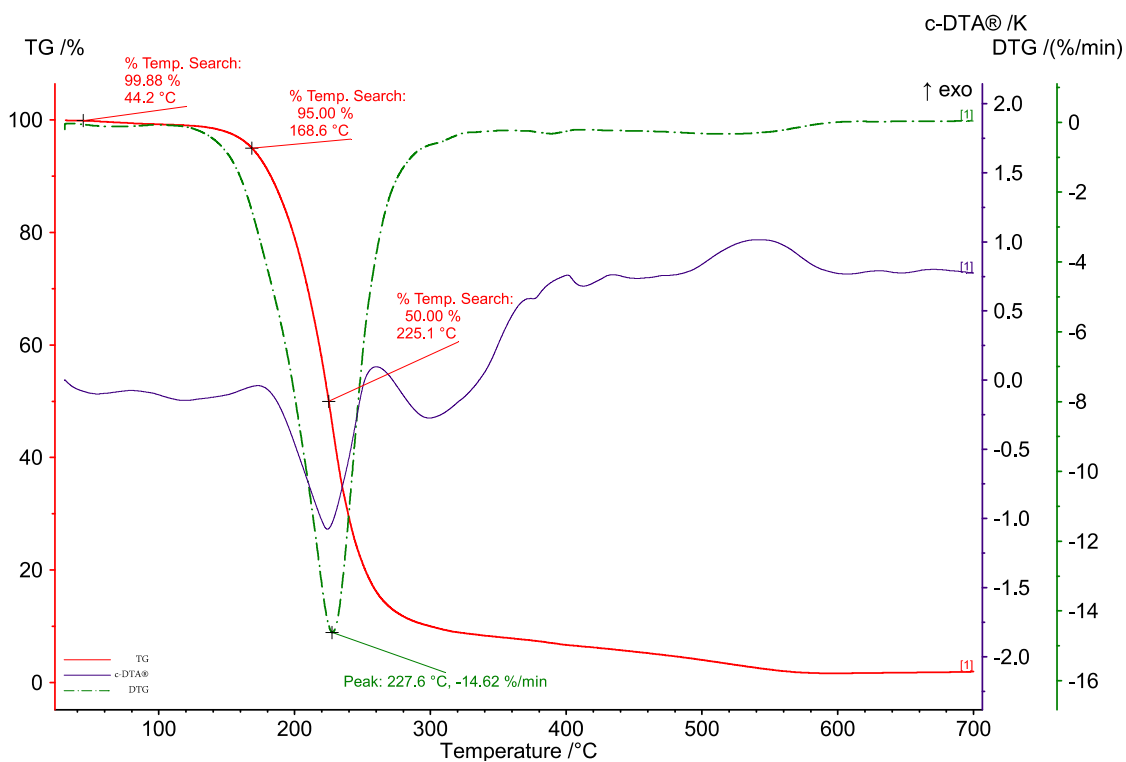

The TG, DTG and c-DTA curves of tris(2-hydroxyethyl)ammonium L- isoleucinate, [TEAH]<sup>+</sup>[Ile]<sup>-</sup>

#### 4. COPIES OF CURVES FROM DSC ANALYSIS OF AMINO ACID IONIC LIQUIDS

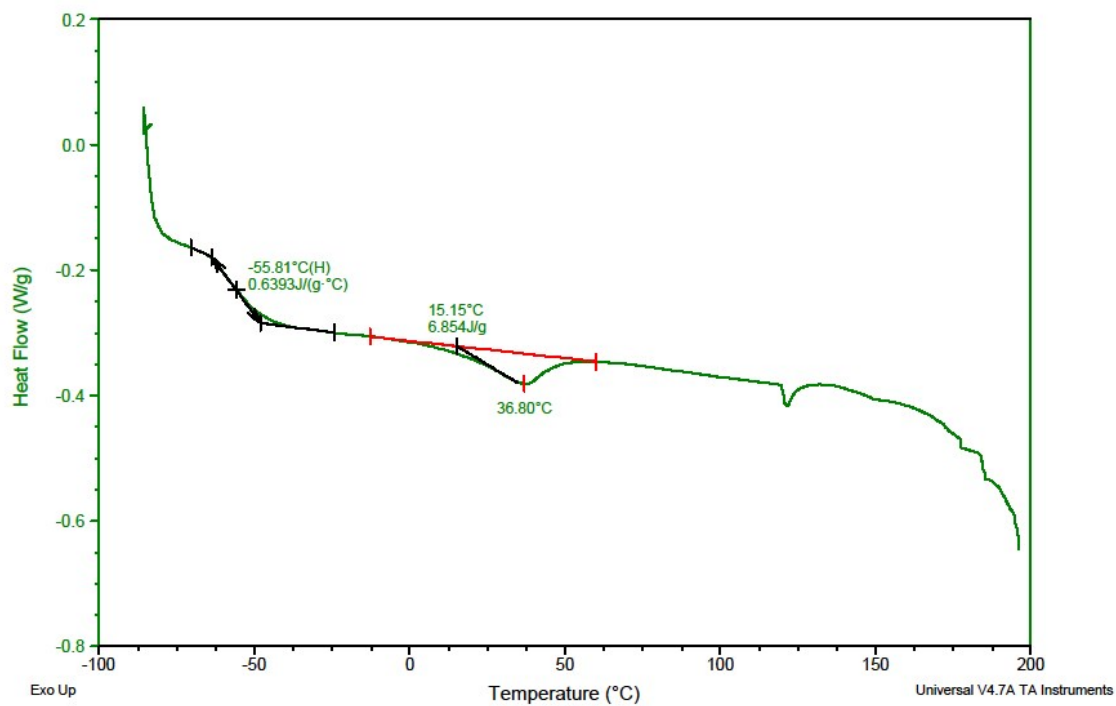

The DSC curve of tris(2-hydroxyethyl)ammonium L-methioninate, [TEAH]<sup>+</sup>[Met]<sup>-</sup>, registered in the heating mode from -90°C to 200°C

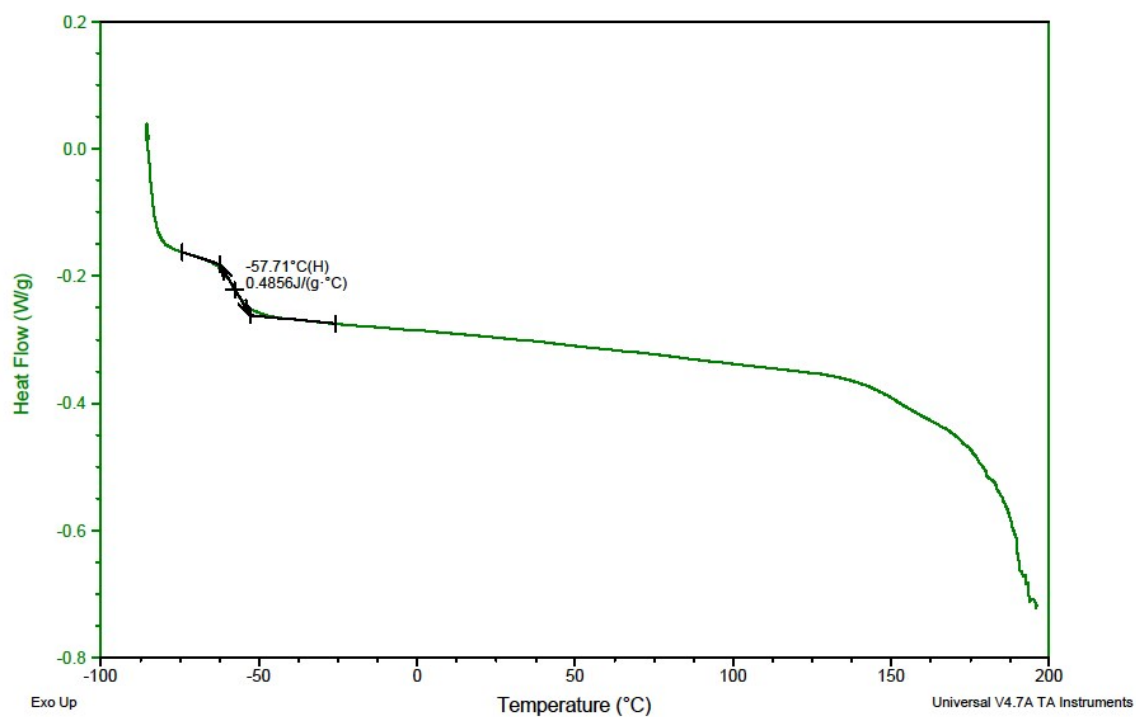

The DSC curve of tris(2-hydroxyethyl)ammonium L-threoninate, [TEAH]<sup>+</sup>[Thr]<sup>-</sup>, registered in the heating mode from -90°C to 200°C



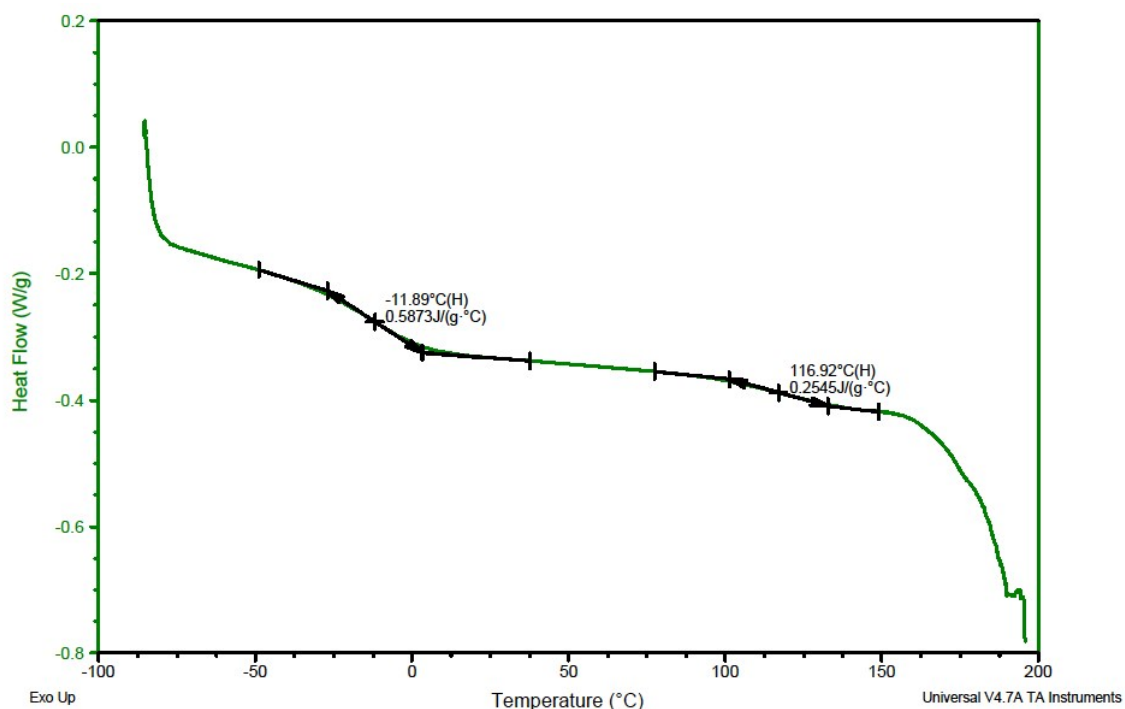

The DSC curve of tris(2-hydroxyethyl)ammonium L-argininate, [TEAH]<sup>+</sup>[Arg]<sup>-</sup>, registered in the heating mode from -90°C to 200°C

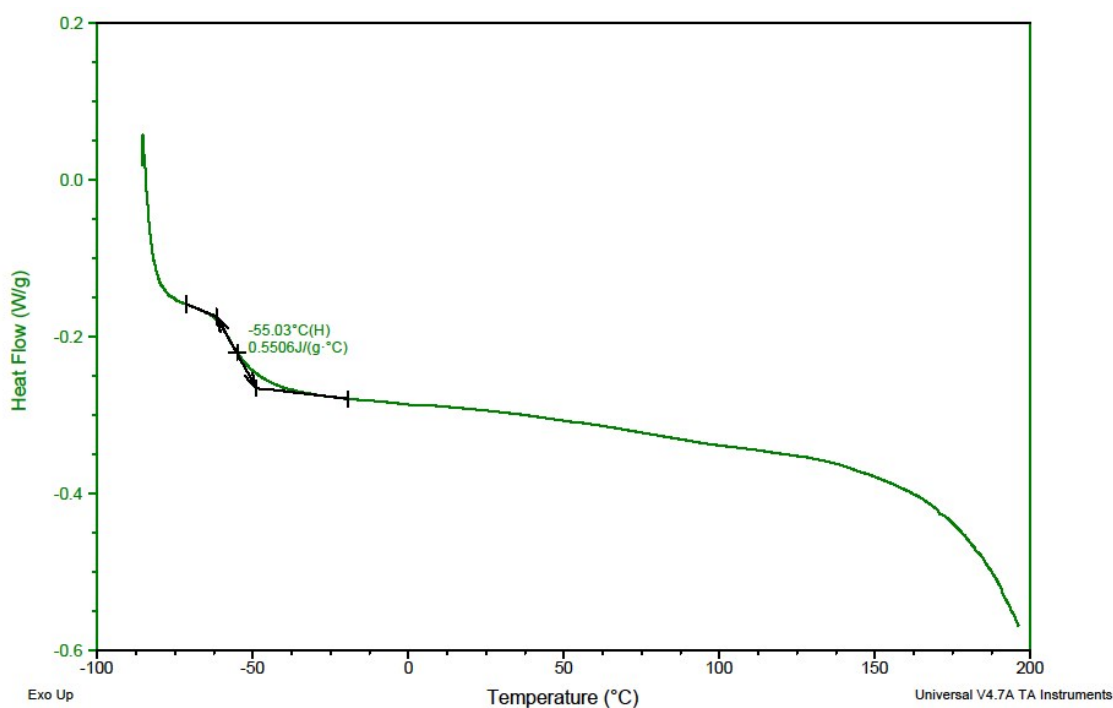

The DSC curve of tris(2-hydroxyethyl)ammonium L-isoleucinate, [TEAH]<sup>+</sup>[Ile]<sup>-</sup>, registered in the heating mode from -90°C to 200°C
